# Supplementary material for: Seroprevalence of SARS-CoV-2 anti-spike IgG antibody among COVID-19 vaccinated individuals residing in Surabaya, East Java, Indonesia
Source: PeerJ. 2023 Sep 25;11:e16142. doi: 10.7717/peerj.16142 (PMC10538276; doi:10.7717/peerj.16142)
Supplement: Supplemental Information 1 [file peerj-11-16142-s001.xlsx]

## Sheet: Sheet1
Code		City/Regency	Sex	Ethnicity	Age	Occupation	Sign/symptom		Vaccination history			Comorbidity		IgG rectivity
							Y/N	Type of sign/ symtpom	Number of dose received	Date of last dose received	Type of vaccine	Y/N	Type of comorbidity
COVID19-Vac	1	Surabaya	M	Jawa	25	Buruh Swasta / Driver Gojek	N		2	2021-08-09	Sinovac	N		Positive
COVID19-Vac	2	Surabaya	M	Jawa	22	Mahasiswa	N		2	2021-08-09	Sinovac	N		Positive
COVID19-Vac	3	Surabaya	M	Jawa	22	Mahasiswa	N		2	2021-05-27	Sinovac	N		Positive
COVID19-Vac	4	Surabaya	M	Jawa	22	Cleaning Service	N		2	2021-03-02	Sinovac	N		Negative
COVID19-Vac	5	Tulungagung	M	Jawa	33	Cleaning Service	N		2	2021-07-01	Astra Zeneca	N		Positive
COVID19-Vac	6	Surabaya	M	Jawa	51	Cleaning Service	N		2	2021-07-01	Astra Zeneca	N		Positive
COVID19-Vac	7	Surabaya	M	Madura	51	Cleaning Service	N		2	2021-07-01	Astra Zeneca	N		Positive
COVID19-Vac	8	Surabaya	M	Jawa	36	Petugas Kebersihan	N		2	2021-07-01	Astra Zeneca	N		Positive
COVID19-Vac	9	Surabaya	M	Jawa	22	Cleaning Service	N		2	2021-07-01	Astra Zeneca	N		Positive
COVID19-Vac	10	Surabaya	M	Madura	53	Cleaning Service	N		2	2021-07-01	Astra Zeneca	N		Positive
COVID19-Vac	11	Surabaya	M	Jawa	53	Swasta	N		2	2021-07-22	Sinovac	N		Positive
COVID19-Vac	12	Surabaya	M	Jawa	42	Cleaning Service	N		2	2021-07-06	Astra Zeneca	N		Positive
COVID19-Vac	13	Surabaya	M	Jawa	32	Cleaning Service	N		2	2021-09-10	Sinovac	N		Positive
COVID19-Vac	14	Surabaya	M	Jawa	40	Cleaning Service	N		2	2021-07-13	Astra Zeneca	N		Positive
COVID19-Vac	15	Surabaya	M	Jawa	20	Cleaning Service	N		2	2021-08-12	Astra Zeneca	N		Positive
COVID19-Vac	16	Surabaya	M	Jawa	19	Cleaning Service	N		2	2021-07-13	Astra Zeneca	N		Positive
COVID19-Vac	17	Surabaya	M	Jawa	33	Parkir	N		2	2021-07-01	Astra Zeneca	N		Positive
COVID19-Vac	18	Surabaya	M	Jawa	28	Swasta	N		2	2021-07-13	AStra Zeneca	N		Positive
COVID19-Vac	19	Sidoarjo	M	Jawa	29	Karyawan	N		2	2021-07-21	AStra Zeneca	N		Positive
COVID19-Vac	20	Surabaya	F	Jawa	31	Karyawan	N		2	2021-08-28	Sinovac	N		Positive
COVID19-Vac	21	Surabaya	F	Jawa	21	Karyawan	N		2	2021-08-12	Astra Zeneca	N		Positive
COVID19-Vac	22	Surabaya	M	Jawa	37	Karyawan	N		2	2021-09-13	Sinovac	N		Positive
COVID19-Vac	23	Sidoarjo	M	Jawa	23	Karyawan	N		2	2021-08-12	Sinovac	N		Positive
COVID19-Vac	24	Surabaya	F	Jawa	60	Cleaning Service	N		2	2021-08-12	Sinovac	N		Positive
COVID19-Vac	25	Surabaya	M	Jawa	50	Cleaning Service	N		2	2021-07-13	Astra Zeneca	N		Positive
COVID19-Vac	26	Surabaya	M	Jawa	36	Karyawan	N		2	2021-08-06	Sinovac	N		Positive
COVID19-Vac	27	Surabaya	M	Sumatra	30	Cleaning Service	N		2	2021-07-13	Astra Zeneca	N		Positive
COVID19-Vac	28	Surabaya	M	Jawa	25	Cleaning Service	N		2	2021-09-08	Sinovac	N		Positive
COVID19-Vac	29	Surabaya	M	Jawa	25	Karyawan	N		2	2021-07-01	Astra Zeneca	N		Positive
COVID19-Vac	30	Surabaya	F	Jawa	26	Karyawan	N		2	2021-08-07	Sinovac	N		Positive
COVID19-Vac	31	Surabaya	F	jawa	34	Cleaning Service	N		2	2021-07-13	Astra Zeneca	N		Positive
COVID19-Vac	32	Surabaya	M	Jawa	46	Security	N		2	2021-06-29	Astra Zeneca	N		Positive
COVID19-Vac	33	Sidoarjo	M	Jawa	49	Karyawan	N		2	2021-07-01	Astra Zeneca	N		Positive
COVID19-Vac	34	Surabaya	F	Jawa	42	Karyawan	N		2	2021-07-01	Astra Zeneca	N		Positive
COVID19-Vac	35	Surabaya	M	Jawa	42	Karyawan	N		2	2021-07-01	Astra Zeneca	N		Positive
COVID19-Vac	36	Surabaya	F	Jawa	42	Cleaning Service	N		2	2021-08-12	Astra Zeneca	N		Positive
COVID19-Vac	37	Surabaya	M	Jawa	36	Swasta	N		2	2021-07-02	AStra Zeneca	N		Positive
COVID19-Vac	38	Sidoarjo	M	Jawa	47	Cleaning Service	N		2	2021-06-29	AStra Zeneca	N		Positive
COVID19-Vac	39	Surabaya	M	Jawa	51	Cleaning Service	N		2	2021-07-13	Astra Zeneca	N		Positive
COVID19-Vac	40	Surabaya	F	Jawa	55	Ibu Rumah Rangga	N		2	2021-07-12	Sinovac	N		Positive
COVID19-Vac	41	Surabaya	F	Jawa	52	Ibu Rumah Rangga	N		2	2021-07-12	Sinovac	N		Positive
COVID19-Vac	42	Surabaya	F	Jawa	26	Ibu Rumah Rangga	N		2	2021-09-11	Sinovac	N		Positive
COVID19-Vac	43	Surabaya	F	Jawa	19	Karyawan	N		2	2021-08-13	Sinovac	N		Positive
COVID19-Vac	44	Surabaya	F	Jawa	37	Ibu Rumah Rangga	N		2	2021-08-12	Sinovac	N		Positive
COVID19-Vac	45	Surabaya	M	Jawa	26	Karyawan	N		2	2021-09-11	Sinovac	N		Positive
COVID19-Vac	46	Surabaya	F	Jawa	27	Karyawan	N		2	2021-08-14	Sinovac	N		Positive
COVID19-Vac	47	Surabaya	M	Jawa	35	Swasta	N		2	2021-08-08	Sinovac	N		Positive
COVID19-Vac	48	Surabaya	M	Jawa	40	Tukang Parkir	N		2	2021-07-21	Astra Zeneca	N		Positive
COVID19-Vac	49	Surabaya	M	Jawa	30	Swasta	N		2	2021-05-27	Astra Zeneca	N		Positive
COVID19-Vac	50	Surabaya	M	Jawa	54	PNS	N		2	2021-06-30	AStra Zeneca	N		Positive
COVID19-Vac	51	Surabaya	F	Jawa	44	Cleaning Service	N		2	2021-07-01	AStra Zeneca	N		Positive
COVID19-Vac	52	Surabaya	M	Jawa	30	Swasta	N		2	2021-06-29	AStra Zeneca	N		Positive
COVID19-Vac	53	Sidoarjo	M	Jawa	38	Supir	N		2	2021-07-25	Astra Zeneca	N		Positive
COVID19-Vac	54	Surabaya	M	Jawa	36	Swasta	N		2	2021-07-01	Astra Zeneca	N		Positive
COVID19-Vac	55	Surabaya	M	Jawa	30	Swasta	N		2	2021-07-01	Astra Zeneca	N		Positive
COVID19-Vac	56	Surabaya	M	Jawa	27	Cleaning Service	N		2	2021-07-01	Astra Zeneca	N		Positive
COVID19-Vac	57	Surabaya	M	Jawa	25	Cleaning Service	N		2	2021-07-01	Astra Zeneca	N		Positive
COVID19-Vac	58	Surabaya	M	Jawa	30	Tukang Parkir	N		2	2021-07-01	Astra Zeneca	N		Positive
COVID19-Vac	59	Bangkalan, Madura	M	Madura	35	Cleaning Service	N		2	2021-07-10	Astra Zeneca	N		Positive
COVID19-Vac	60	Surabaya	M	Jawa	58	Swasta	N		2	2021-05-01	Sinovac	N		Positive
COVID19-Vac	61	Surabaya	M	Jawa	31	Swasta	N		2	2021-06-01	Astra Zeneca	N		Positive
COVID19-Vac	62	Surabaya	M	Jawa	36	Gojek	N		2	2021-08-13	Sinovac	N		Positive
COVID19-Vac	63	Surabaya	M	Jawa	26	Cleaning Service	N		2	2021-08-25	Sinovac	N		Positive
COVID19-Vac	64	Surabaya	M	Jawa	23	Cleaning Service	N		2	2021-07-12	Astra Zeneca	N		Positive
COVID19-Vac	65	Surabaya	M	Jawa	17	Pelajar	N		2	2021-08-13	Sinovac	N		Positive
COVID19-Vac	66	Surabaya	F	Jawa	23	Ibu Rumah Rangga	N		2	2021-08-14	Sinovac	N		Positive
COVID19-Vac	67	Surabaya	M	Jawa	24	Swasta	N		2	2021-07-26	Astra Zeneca	N		Positive
COVID19-Vac	68	Surabaya	M	Jawa	23	Swasta	N		2	2021-07-25	Astra Zeneca	N		Positive
COVID19-Vac	69	Surabaya	F	Jawa	32	Ibu Rumah Rangga	N		2	2021-05-16	Sinovac	N		Positive
COVID19-Vac	70	Surabaya	M	Jawa	35	Swasta	N		2	2021-08-13	Sinovac	N		Positive
COVID19-Vac	71	Surabaya	M	Jawa	30	Cleaning Service	N		2	2021-07-12	Astra Zeneca	N		Positive
COVID19-Vac	72	Surabaya	F	Jawa	25	Cleaning Service	N		2	2021-07-01	Astra Zeneca	N		Positive
COVID19-Vac	73	Surabaya	M	Jawa	45	Tukang Parkir	N		2	2021-07-01	Astra Zeneca	N		Positive
COVID19-Vac	74	Surabaya	F	Jawa	46	Cleaning Service	N		2	2021-07-31	Astra Zeneca	N		Positive
COVID19-Vac	75	Surabaya	F	Jawa	56	Ibu Rumah Rangga	N		2	2021-08-06	Sinovac	N		Positive
COVID19-Vac	76	Surabaya	M	Jawa	57	Swasta	N		2	2021-08-06	Sinovac	N		Positive
COVID19-Vac	77	Surabaya	F	Jawa	42	Swasta	N		2	2021-08-12	Sinovac	N		Positive
COVID19-Vac	78	Surabaya	F	Jawa	48	Ibu Rumah Rangga	N		2	2021-08-12	Sinovac	N		Positive
COVID19-Vac	79	Surabaya	F	Jawa	24	Swasta	N		2	2021-09-16	Sinovac	N		Positive
COVID19-Vac	80	Surabaya	M	Jawa	25	Cleaning Service	N		2	2021-07-01	Astra Zeneca	N		Positive
COVID19-Vac	81	Surabaya	M	Jawa	22	Tidak bekerja	N		2	2021-08-14	Sinovac	N		Positive
COVID19-Vac	82	Surabaya	M	Jawa	30	Pengurus lingkungan	N		2	2021-07-01	Astra Zeneca	N		Positive
COVID19-Vac	83	Surabaya	F	Jawa	51	Swasta	N		2	2021-09-10	Sinovac	N		Positive
COVID19-Vac	84	Surabaya	F	Jawa	19	Swasta	N		2	2021-09-10	Sinovac	N		Positive
COVID19-Vac	85	Surabaya	M	Jawa	30	Swasta	N		2	2021-08-09	Sinovac	N		Positive
COVID19-Vac	86	Surabaya	M	Jawa	25	Swasta	N		2	2021-08-09	Sinovac	N		Positive
COVID19-Vac	87	Surabaya	M	Jawa	24	Swasta	N		2	2021-05-22	Sinovac	N		Positive
COVID19-Vac	88	Surabaya	M	Jawa	21	Cleaning Service	N		2	2021-08-03	Sinovac	N		Positive
COVID19-Vac	89	Surabaya	M	Jawa	39	Tukang Parkir	N		2	2021-07-01	Astra Zeneca	N		Positive
COVID19-Vac	90	Surabaya	M	Jawa	57	Swasta	N		2	2021-08-05	Sinovac	N		Positive
COVID19-Vac	91	Surabaya	M	Jawa	22	Cleaning Service	N		2	2021-07-23	Sinovac	N		Positive
COVID19-Vac	92	Surabaya	M	Jawa	30	Tukang kebun	N		2	2021-07-01	Astra Zeneca	N		Negative
COVID19-Vac	93	Surabaya	M	Jawa	40	Tukang kebun	N		2	2021-07-01	Astra Zeneca	N		Positive
COVID19-Vac	94	Surabaya	M	Jawa	45	Tukang kebun	N		2	2021-07-01	Astra Zeneca	N		Negative
COVID19-Vac	95	Surabaya	F	Jawa	42	Cleaning Service	N		2	2021-07-13	Astra Zeneca	N		Positive
COVID19-Vac	96	Surabaya	M	Jawa	24	Tukang kebun	N		2	2021-07-01	Astra Zeneca	N		Positive
COVID19-Vac	97	Surabaya	M	Jawa	41	Tulkang Parkir	N		2	2021-06-25	Astra Zeneca	N		Positive
COVID19-Vac	98	Surabaya	M	Jawa	20	Tukang Parkir	N		2	2021-07-02	Astra Zeneca	N		Positive
COVID19-Vac	99	Surabaya	M	Jawa	38	Karyawan koperasi	N		2	2021-06-25	Astra Zeneca	N		Positive
COVID19-Vac	100	Surabaya	M	Jawa	22	Kurir	N		2	2021-08-12	Sinovac	N		Positive
COVID19-Vac	101	Surabaya	F	Jawa	52		N		2	2021-02-14	Sinovac	N		Positive
COVID19-Vac	102	Surabaya	M	Jawa	82	Pensiunan	N		2	2021-03-25	Sinovac	N		Negative
COVID19-Vac	103	Surabaya	F	Jawa	80	Pensiunan	N		2	2021-03-25	Sinovac	N		Positive
COVID19-Vac	104	Surabaya	F	Jawa	57	Tenaga medis	N		2	2021-03-25	Sinovac	Y	Asam urat, hiperkolesterolemia	Positive
COVID19-Vac	105	Surabaya	M	Jawa	27	Dosen	N		2	2021-02-14	Sinovac	N		Negative
COVID19-Vac	106	Surabaya	F	Jawa	57	Tenaga medis	N		2	2021-02-14	Sinovac	Y	Diabetes mellitus, hipertensi, hiperkolesterolemia, GERD	Positive
COVID19-Vac	107	Surabaya	F	Jawa	27	Tenaga medis	N		2	2021-02-28	Sinovac	N		Positive
COVID19-Vac	108	Surabaya	F	Jawa	23	Tenaga medis	N		2	2021-02-14	Sinovac	N		Positive
COVID19-Vac	109	Surabaya	M	Jawa	22	Mahasiswa	N		2	2021-07-23	Sinovac	N		Positive
COVID19-Vac	110	Surabaya	F	Jawa	47		N		2	2021-07-01	Astra Zeneca	N		Positive
COVID19-Vac	111	Surabaya	M	Jawa	21	Mahasiwa	N		2	2021-07-23	Sinovac	N		Positive
COVID19-Vac	112	Surabaya	M	Jawa	25	Tendik	N		2	2021-07-23	Sinovac	N		Positive
COVID19-Vac	113	Surabaya	M	Jawa	36	Swasta	N		2	2021-07-12	Sinovac	N		Positive
COVID19-Vac	114	Surabaya	F	Jawa	63	Ibu Rumah Tangga	N		2	2021-07-06	Sinovac	N		Positive
COVID19-Vac	115	Surabaya	M	Jawa	52	Cleaning Service	N		2	2021-06-30	Astra Zeneca	Y	Hipertensi	Positive
COVID19-Vac	116	Surabaya	F		43	Karyawan	N		2	2021-06-30	Astra Zeneca	N		Positive
COVID19-Vac	117	Surabaya	M	Jawa	69	Swasta	N		2	2021-05-07	Sinovac	Y	Hipertensi	Positive
COVID19-Vac	118	Surabaya	M	Jawa	31	Karyawan	N		2	2021-03-26	Sinovac	N		Negative
COVID19-Vac	119	Surabaya	M		36	Karyawan	N		2	2021-06-30	Astra Zeneca	N		Positive
COVID19-Vac	120	Sidoarjo	M	Jawa	34	Tendik	N		2	2021-05-29	Astra Zeneca	N		Positive
COVID19-Vac	121	Surabaya	M	Jawa	42	Karyawan	N		2	2021-06-29	AStra Zeneca	N		Positive
COVID19-Vac	122	Surabaya	M	Jawa	25	Cleaning Service	N		2	2021-09-06	Sinovac	N		Positive
COVID19-Vac	123	Surabaya	M	Jawa	24	Cleaning Service	N		2	2021-09-09	Sinovac	N		Positive
COVID19-Vac	124	Sidoarjo	M	Jawa	36	Karyawan	N		2	2021-03-26	Sinovac	N		Positive
COVID19-Vac	125	Surabaya	M	Jawa	26	Cleaning Service	N		2	2021-08-26	Sinovac	N		Negative
COVID19-Vac	126	Surabaya	M	Jawa	24	Karyawan	N		2	2021-07-13	Astra Zeneca	N		Negative
COVID19-Vac	127	Surabaya	F	Jawa	27	Swasta	N		2	2021-07-13	Astra Zeneca	N		Positive
COVID19-Vac	128	Surabaya	M	Jawa	24	Swasta	N		2	2021-07-13	Astra Zeneca	N		Positive
COVID19-Vac	129	Surabaya	M	Jawa	23	Karyawan	N		2	2021-07-13	Astra Zeneca	N		Positive
COVID19-Vac	130	Surabaya	M	Jawa	49	Karyawan	N		2	2021-07-01	Astra Zeneca	N		Positive
COVID19-Vac	131	Surabaya	M	Madura	42	Driver	N		2	2021-06-29	Astra Zeneca	Y	Diabetes Mellitus	Positive
COVID19-Vac	132	Surabaya	M	Jawa	59	Driver	N		2	2021-07-19	Sinovac	N		Positive
COVID19-Vac	133	Surabaya	M	Jawa	24	Swasta	N		2	2021-08-15	Sinovac	N		Positive
COVID19-Vac	134	Surabaya	M	Jawa	19	Swasta	N		2	2021-08-15	Sinovac	N		Positive
COVID19-Vac	135	Surabaya	F	Jawa	52	Ibu Rumah Tangga	N		2	2021-08-15	Sinovac	N		Positive
COVID19-Vac	136	Surabaya	M	Jawa	38	Cleaning Service	N		2	2021-07-13	Astra Zeneca	N		Positive
COVID19-Vac	137	Surabaya	F	Jawa	54	Tendik	N		2	2021-06-20	Astra Zeneca	N		Positive
COVID19-Vac	138	Surabaya	M	Jawa	53	Driver	N		2	2021-08-21	Sinovac	N		Positive
COVID19-Vac	139	Surabaya	M	Madura	27	Cleaning Service	N		2	2021-07-01	Astra Zeneca	N		Positive
COVID19-Vac	140	Surabaya	M	Jawa	49	Karyawan	N		2	2021-07-01	Astra Zeneca	N		Positive
COVID19-Vac	141	Surabaya	M	Jawa	21	Cleaning Service	N		2	2021-07-01	Astra Zeneca	N		Negative
COVID19-Vac	142	Bangkalan, Madura	M	Madura	20	CV	N		2	2021-07-01	Astra Zeneca	N		Positive
COVID19-Vac	143	Surabaya	M	Jawa	20	Mahasiwa	N		2	2021-08-22	Sinovac	N		Positive
COVID19-Vac	144	Surabaya	F	Jawa	37	Cleaning Service	N		2	2021-07-01	Astra Zeneca	N		Positive
COVID19-Vac	145	Surabaya	M	Jawa	47	Cleaning Service	N		2	2021-07-13	Astra Zeneca	N		Positive
COVID19-Vac	146	Surabaya	M	Jawa	43	Ojek Online	N		2	2021-08-14	Sinovac	Y	Hiperkolesterolemia	Positive
COVID19-Vac	147	Surabaya	F	Jawa	53	Swasta	N		2	2021-07-23	Sinovac	N		Negative
COVID19-Vac	148	Surabaya	F	Jawa	58		N		2	2021-07-06	Sinovac	N		Positive
COVID19-Vac	149	Surabaya	F	Jawa	68		N		2	2021-03-26	Sinovac	N		Positive
COVID19-Vac	150	Surabaya	M	Jawa	24	Cleaning Service	N		2	2021-07-01	Astra Zeneca	N		Positive
COVID19-Vac	151	Surabaya	M	Jawa	24	Cleaning Service	N		2	2021-07-01	Sinovac	N		Positive
COVID19-Vac	152	Surabaya	M	Jawa	26	Swasta	N		2	2021-08-13	Sinovac	N		Positive
COVID19-Vac	153	Surabaya	M	Jawa	23	Cleaning Service	N		2	2021-07-01	Astra Zeneca	N		Positive
COVID19-Vac	154	Surabaya	M	Jawa	51	Swasta	N		2	2021-07-01	Sinovac	N		Positive
COVID19-Vac	155	Surabaya	M	Jawa	26	Cleaning Service	N		2	2021-07-01	Astra Zeneca	N		Positive
COVID19-Vac	156	Surabaya	F	Jawa	57	Ibu Rumah Tangga	N		2	2021-05-24	Sinovac	N		Negative
COVID19-Vac	157	Surabaya	F	Jawa	57		N		2	2021-09-07	Sinovac	N		Positive
COVID19-Vac	158	Surabaya	M	Jawa	64		N		2	2021-03-26	Sinovac	N		Positive
COVID19-Vac	159	Surabaya	F	Jawa	61	Ibu Rumah Tangga	N		2	2021-03-26	Sinovac	N		Positive
COVID19-Vac	160	Surabaya	F	Jawa	54	Karyawan	N		2	2021-07-23	Sinovac	N		Positive
COVID19-Vac	161	Surabaya	M	Jawa	22	Wiraswasta	N		2	2021-09-11	Sinovac	N		Positive
COVID19-Vac	162	Bangkalan, Madura	M	Madura	25	Cleaning Service	N		2	2021-07-01	Astra Zeneca	N		Positive
COVID19-Vac	163	Surabaya	M		38	Karyawan	N		2	2021-06-29	Astra Zeneca	N		Positive
COVID19-Vac	164	Malang	M	Jawa	45	Swasta	N		2	2021-07-01	Astra Zeneca	N		Positive
COVID19-Vac	165	Surabaya	M	Jawa	38	Tendik	N		2	2021-05-29	Astra Zeneca	N		Positive
COVID19-Vac	166	Surabaya	M	Jawa	38	Karyawan	N		2	2021-06-29	Astra Zeneca	N		Positive
COVID19-Vac	167	Surabaya	F		30	Ibu Rumah Tangga	N		2	2021-07-05	Astra Zeneca	N		Positive
COVID19-Vac	168	Surabaya	F	Jawa	52	Swasta	N		2	2021-07-26	Astra Zeneca	N		Positive
COVID19-Vac	169	Surabaya	F	Jawa	21	Cleaning Service	N		2	2021-07-01	Astra Zeneca	N		Positive
COVID19-Vac	170	Surabaya	M	Jawa	62	Swasta	N		2	2021-06-15	Sinovac	Y	Diabetes Mellitus	Positive
COVID19-Vac	171	Surabaya	F		49	Ibu Rumah Tangga	N		2	2021-06-28	Astra Zeneca	N		Positive
COVID19-Vac	172	Surabaya	M	Jawa	64	Pen FKG	N		2	2021-03-30	Sinovac	Y	Asam Urat Lebih Dari Normal	Positive
COVID19-Vac	173	Jombang	M		46	Satpam	N		2	2021-06-25	Astra Zeneca	N		Positive
COVID19-Vac	174	Surabaya	F	Jawa	26	Karyawan	N		2	2021-02-23	Sinovac	N		Positive
COVID19-Vac	175	Surabaya	M	Jawa	25	Karyawan	N		2	2021-08-09	Sinovac	N		Positive
COVID19-Vac	176	Surabaya	M	Jawa	47	Karyawan	N		2	2021-07-01	Sinovac	Y	Hipertensi	Positive
COVID19-Vac	177	Surabaya	M	Jawa	36	Satpam	N		2	2021-07-01	AStra Zeneca	N		Positive
COVID19-Vac	178	Surabaya	M	Jawa	28	Karyawan	N		2	2021-02-23	Sinovac	N		Positive
COVID19-Vac	179	Surabaya	F	Jawa	43	Pedagang	N		2	2021-09-08	Sinovac	N		Positive
COVID19-Vac	180	Surabaya	F	Jawa	47	Ibu Rumah Tangga	N		2	2021-08-13	Sinovac	N		Positive
COVID19-Vac	181	Surabaya	F		38	Tendik	N		2	2021-07-01	AStra Zeneca	N		Positive
COVID19-Vac	182	Surabaya	M	Jawa	42	Swasta	N		2	2021-06-28	AStra Zeneca	N		Positive
COVID19-Vac	183	Surabaya	F	Jawa	67		N		2	2021-07-21	Sinovac	N		Positive
COVID19-Vac	184	Surabaya	M	Jawa	22	Swasta	N		2	2021-09-09	Sinovac	N		Positive
COVID19-Vac	185	Surabaya	F	Jawa	17	Rumah Tangga	N		2	2021-09-09	Sinovac	N		Positive
COVID19-Vac	186	Surabaya	F	Jawa	30	Ibu Rumah Tangga	N		2	2021-08-19	Sinovac	N		Positive
COVID19-Vac	187	Surabaya	F	Jawa	40	Ibu Rumah Tangga	N		2	2021-09-09	Sinovac	N		Positive
COVID19-Vac	188	Surabaya	F	Jawa	20		N		2	2021-08-14	Sinovac	N		Positive
COVID19-Vac	189	Surabaya	M	Jawa	28	Swasta	N		2	2021-08-13	Sinovac	N		Positive
COVID19-Vac	190	Surabaya	M	Jawa	59	Swasta	N		2	2021-07-19	Sinovac	N		Positive
COVID19-Vac	191	Surabaya	F	Jawa	17		N		2	2021-08-13	Sinovac	N		Positive
COVID19-Vac	192	Surabaya	F	Jawa	49	Ibu Rumah Tangga	N		2	2021-08-13	Sinovac	N		Positive
COVID19-Vac	193	Surabaya	F	Jawa	50	Ibu Rumah Tangga	N		2	2021-06-28	Astra Zeneca	N		Positive
COVID19-Vac	194	Surabaya	F	Jawa	47	Cleaning Service	N		2	2021-07-31	Astra Zeneca	N		Positive
COVID19-Vac	195	Surabaya	F	Jawa	20	Cleaning Service	N		2	2021-03-16	Sinovac	N		Negative
COVID19-Vac	196	Surabaya	M	Jawa	20	Cleaning Service	N		2	2021-07-12	Astra Zeneca	N		Positive
COVID19-Vac	197	Surabaya	F	Jawa	37	Ibu Rumah Tangga	N		2	2021-07-05	Sinovac	N		Positive
COVID19-Vac	198	Surabaya	F	Jawa	19	Swata	N		2	2021-08-12	Sinovac	N		Positive
COVID19-Vac	199	Surabaya	F	Jawa	53	Ibu Rumah Tangga	N		2	2021-07-13	Sinovac	Y	Diabetes Mellitus	Positive
COVID19-Vac	200	Surabaya	F	Jawa	38	Ibu Rumah Tangga	N		2	2021-08-19	Sinovac	N		Positive
COVID19-Vac	201	Surabaya	M	Jawa	33	Karyawan	N		2	2021-08-09	Sinovac	N		Positive
COVID19-Vac	202	Pasuruan	M	Jawa	55	Kuli Kapal	N		2	2021-09-09	Sinovac	N		Positive
COVID19-Vac	203	Surabaya	M	Jawa	35		N		2	2021-07-11	Sinovac	N		Positive
COVID19-Vac	204	Surabaya	F	Jawa	42	Cleaning Service	N		2	2021-08-18	Astra Zeneca	Y	Kolesterol	Positive
COVID19-Vac	205	Sidoarjo	M	Jawa	43	Cleaning Service	N		2	2021-08-18	Astra Zeneca	N		Positive
COVID19-Vac	206	Surabaya	F	Jawa	36	Cleaning Service	N		2	2021-07-12	Astra Zeneca	N		Positive
COVID19-Vac	207	Surabaya	M	Jawa	30	Swasta	N		2	2021-08-04	Sinovac	N		Positive
COVID19-Vac	208	Surabaya	M	Jawa	25	Cleaning Service	N		2	2021-08-10	Sinovac	N		Positive
COVID19-Vac	209	Surabaya	M	Jawa	27	Swasta	N		2	2021-08-04	Sinovac	N		Positive
COVID19-Vac	210	Surabaya	F	Jawa	35	Ibu Rumah Tangga	N		2	2021-03-03	Sinovac	N		Positive
COVID19-Vac	211	Surabaya	F	Jawa	44	Cleaning Service	N		2	2021-09-12	Astra Zeneca	N		Positive
COVID19-Vac	212	Surabaya	F	Jawa	25	Staff Laboratorium	N		2	2021-08-06	Sinovac	N		Positive
COVID19-Vac	213	Surabaya	F	Jawa	24	Mahasiswa	N		2	2021-08-22	Sinovac	N		Positive
COVID19-Vac	214	Surabaya	M	Jawa	22	Cleaning Service	N		2	2021-07-13	Astra Zeneca	N		Positive
COVID19-Vac	215	Surabaya	M	Jawa	45	PNS	N		2	2021-06-29	Astra Zeneca	N		Positive
COVID19-Vac	216	Surabaya	M	Jawa	23	Cleaning Service	N		2	2021-07-13	Astra Zeneca	N		Positive
COVID19-Vac	217	Surabaya	F	Jawa	31	Cleaning Service	N		2	2021-07-13	Astra Zeneca	N		Positive
COVID19-Vac	218	Surabaya	F	Jawa	43	Cleaning Service	N		2	2021-07-01	Astra Zeneca	N		Negative
COVID19-Vac	219	Surabaya	M	Jawa	26	Cleaning Service	N		2	2021-07-13	Astra Zeneca	N		Positive
COVID19-Vac	220	Surabaya	M	Madura	25	Cleaning Service	N		2	2021-07-13	Astra Zeneca	N		Positive
COVID19-Vac	221	Surabaya	M	Jawa	26	Cleaning Service	N		2	2021-07-13	Astra Zeneca	N		Positive
COVID19-Vac	222	Surabaya	F	Jawa	45	Cleaning Service	N		2	2021-07-13	Astra Zeneca	Y	Hipertensi	Positive
COVID19-Vac	223	Surabaya	M	Jawa	26	Cleaning Service	N		2	2021-07-28	Astra Zeneca	N		Positive
COVID19-Vac	224	Surabaya	F	Jawa	41	Cleaning Service	N		2	2021-07-13	Astra Zeneca	N		Positive
COVID19-Vac	225	Surabaya	F	Jawa	38	Cleaning Service	N		2	2021-07-13	Astra Zeneca	N		Positive
COVID19-Vac	226	Surabaya	M	Jawa	42	Cleaning Service	N		2	2021-07-13	Astra Zeneca	N		Positive
COVID19-Vac	227	Surabaya	F	Jawa	41	Cleaning Service	N		2	2021-07-13	Astra Zeneca	N		Positive
COVID19-Vac	228	Surabaya	F	Jawa	47	Cleaning Service	N		2	2021-07-13	Astra Zeneca	N		Positive
COVID19-Vac	229	Surabaya	M	Madura	30	Cleaning Service	N		2	2021-07-06	Astra Zeneca	N		Positive
COVID19-Vac	230	Surabaya	M	Jawa	29	Cleaning Service	N		2	2021-07-06	Astra Zeneca	N		Positive
COVID19-Vac	231	Surabaya	M		53	Driver	N		2	2021-06-25	Astra Zeneca	N		Positive
COVID19-Vac	232	Surabaya	M	Jawa	45	Gardener	N		2	2021-08-09	Sinovac	N		Positive
COVID19-Vac	233	Surabaya	M	Jawa	38	Swasta	N		2	2021-09-10	Astra Zeneca	N		Positive
COVID19-Vac	234	Surabaya	M	Jawa	24	Swasta	N		2	2021-08-10	Sinovac	N		Positive
COVID19-Vac	235	Surabaya	F	Jawa	47	Ibu Rumah Tangga	N		2	2021-09-10	Sinovac	N		Positive
COVID19-Vac	236	Surabaya	M	Jawa	36	Swasta	N		2	2021-08-30	Sinovac	N		Negative
COVID19-Vac	237	Sidoarjo	F	Jawa	48	Swasta	N		2	2021-08-20	Sinovac	N		Negative
COVID19-Vac	238	Surabaya	M	Jawa	36	Swasta	N		2	2021-07-13	Sinovac	N		Positive
COVID19-Vac	239	Surabaya	M	Jawa	25	Cleaning Service	N		2	2021-06-25	Sinovac	N		Positive
COVID19-Vac	240	Surabaya	M	Jawa	47	Swasta	N		2	2021-09-03	Sinovac	N		Positive
COVID19-Vac	241	Surabaya	F	Jawa	56	Swasta	N		2	2021-07-13	Sinovac	N		Positive
COVID19-Vac	242	Surabaya	M	Jawa	26	Cleaning Service	N		2	2021-03-02	Sinovac	N		Positive
COVID19-Vac	243	Gresik	F	Jawa	28	Staff Laboratorium	N		2	2021-08-01	Sinovac	N		Positive
COVID19-Vac	244	Surabaya	F	Jawa	17	Pelajar	N		2	2021-09-01	Sinovac	N		Positive
COVID19-Vac	245	Surabaya	M	Jawa	38	Cleaning Service	N		2	2021-03-02	Sinovac	N		Positive
COVID19-Vac	246	Surabaya	F	Jawa	29	Peneliti	N		2	2021-03-02	Sinovac	N		Positive
COVID19-Vac	247	Surabaya	F	Jawa	45	Cleaning Service	N		2	2021-03-02	Sinovac	N		Positive
COVID19-Vac	248	Surabaya	F	Jawa	25	Petugas Laboratorium	N		2	2021-08-22	Sinovac	N		Positive
COVID19-Vac	249	Surabaya	F	Jawa	17	Pelajar	N		2	2021-09-01	Sinovac	N		Positive
COVID19-Vac	250	Jombang	F	Jawa	35	Swasta	N		2	2021-03-02	Sinovac	N		Positive
COVID19-Vac	251	Surabaya	F	Jawa	22	Mahasiswa	N		2	2021-08-06	Sinovac	N		Positive
COVID19-Vac	252	Surabaya	F	Jawa	18		N		2	2021-08-20	Sinovac	N		Positive
COVID19-Vac	253	Surabaya	F	Jawa	20		N		2	2021-09-07	Sinovac	N		Positive
COVID19-Vac	254	Surabaya	F	Jawa	21	Mahasiswa	N		2	2021-08-22	Sinovac	N		Positive
COVID19-Vac	255	Jember	F	Jawa	21		N		2	2021-09-06	Sinovac	N		Positive
COVID19-Vac	256	Surabaya	F	Jawa	22		N		2	2021-09-15	Sinovac	N		Positive
COVID19-Vac	257	Surabaya	F	Jawa	21		N		2	2021-07-23	Sinovac	N		Positive
COVID19-Vac	258	Surabaya	F	Jawa	40	Ibu Rumah Tangga	N		2	2021-08-05	Sinovac	N		Positive
COVID19-Vac	259	Surabaya	F	Jawa	20	Swasta	N		2	2021-09-06	Sinovac	N		Positive
COVID19-Vac	260	SUrabaya	M	Jawa	67	Swasta	N		2	2021-05-07	Sinovac	N		Positive
COVID19-Vac	261	Surabaya	M	Jawa	20	Swasta	N		2	2021-09-13	Sinovac	N		Positive
COVID19-Vac	262	Surabaya	M	Jawa	22	Swasta	N		2	2021-09-06	Sinovac	N		Positive
COVID19-Vac	263	Surabaya	M	Jawa	21	Swasta	N		2	2021-09-14	Sinovac	N		Positive
COVID19-Vac	264	Surabaya	M	Jawa	36	Swasta	N		2	2021-09-15	Sinovac	N		Positive
COVID19-Vac	265	Surabaya	M	Jawa	20	Swasta	N		2	2021-09-15	Sinovac	N		Positive
COVID19-Vac	266	Surabaya	M	Jawa	22	Swasta	N		2	2021-08-05	Sinovac	N		Negative
COVID19-Vac	267	Surabaya	F	Jawa	45	Ibu Rumah Tangga	N		2	2021-09-09	Sinovac	N		Positive
COVID19-Vac	268	Surabaya	M	Jawa	47	Swasta	N		2	2021-07-31	Sinovac	N		Positive
COVID19-Vac	269	Surabaya	M	Jawa	53	Satpam	N		2	2021-06-23	Astra Zeneca	N		Positive
COVID19-Vac	270	Surabaya	M	Jawa	35	Swasta	N		2	2021-08-28	Sinovac	N		Positive
COVID19-Vac	271	Surabaya	M	Jawa	26	Swasta	N		2	2021-06-28	Astra Zeneca	N		Positive
COVID19-Vac	272	Surabaya	M	Jawa	35	Swasta	N		2	2021-06-28	Astra Zeneca	N		Positive
COVID19-Vac	273	Surabaya	F	Jawa	49	Wiraswasta	N		2	2021-07-10	Sinovac	N		Positive
COVID19-Vac	274	Surabaya	F	Jawa	39	Ibu Rumah Tangga	N		2	2021-08-05	Sinovac	N		Positive
COVID19-Vac	275	Surabaya	M	Jawa	35	Satpam	N		2	2021-06-28	Astra Zeneca	N		Positive
COVID19-Vac	276	Surabaya	M	Jawa	21	Wirausaha	N		2	2021-09-15	Sinovac	N		Positive
COVID19-Vac	277	Surabaya	M	Jawa	18	Pelajar	N		2	2021-09-06	Sinovac	N		Positive
COVID19-Vac	278	Surabaya	M	Jawa	25	Swasta	N		2	2021-08-13	Sinovac	N		Positive
COVID19-Vac	279	Surabaya	M	Jawa	45	Karyawan Honorer	N		2	2021-06-28	Astra Zeneca	N		Positive
COVID19-Vac	280	Surabaya	F	Jawa	29	Swasta	N		2	2021-08-28	Sinovac	N		Positive
COVID19-Vac	281	Surabaya	M	Jawa	27	Guru	N		2	2021-06-23	Astra Zeneca	N		Positive
COVID19-Vac	282	Surabaya	M	Jawa	47	Swasta	N		2	2021-07-21	Sinovac	N		Negative
COVID19-Vac	283	Surabaya	M	Jawa	40	Swasta	N		2	2021-07-24	Sinovac	N		Positive
COVID19-Vac	284	Surabaya	M	Jawa	34	Swasta	N		2	2021-08-18	Sinovac	N		Positive
COVID19-Vac	285	Surabaya	M	Jawa	41	Swasta	N		2	2021-09-09	Sinovac	N		Positive
COVID19-Vac	286	Surabaya	M	Jawa	21	Swasta	N		2	2021-09-06	Sinovac	N		Positive
COVID19-Vac	287	Madura	F	Madura	19	Mahasiswa	N		2	2021-07-27	Sinovac	N		Positive
COVID19-Vac	288	Surabaya	M	Madura	46	Swasta	N		2	2021-04-07	Sinovac	N		Positive
COVID19-Vac	289	Madura	M	Jawa	56	PNS	N		2	2021-04-07	Sinovac	N		Positive
COVID19-Vac	290	Surabaya	M	Jawa	52	Staff LPT	N		2	2021-03-02	Sinovac	N		Negative
COVID19-Vac	291	Surabaya	F	Jawa	54	Guru	N		2	2021-06-28	Sinovac	Y	Autoimmune disease, dislipidemia	Negative
COVID19-Vac	292	Surabaya	F	Jawa	19	Mahasiswa	N		2	2021-08-06	Sinovac	N		Positive
COVID19-Vac	293	Surabaya	F	Jawa	26	Mahasiswa	N		2	2021-08-02	Sinovac	N		Positive
COVID19-Vac	294	Surabaya	F	Jawa	62	Pegawai swasta	N		2	2021-06-22	Sinovac	N		Positive
COVID19-Vac	295	Surabaya	M	Jawa	50	Swasta	N		2	2021-08-01	Astra Zeneca	N		Positive
COVID19-Vac	296	Surabaya	F	Jawa	31	Karyawan swasta	N		2	2021-08-13	Sinovac	N		Positive
COVID19-Vac	297	Surabaya	F	Jawa	55	Ibu Rumah Tangga	N		2	2021-08-06	Sinovac	Y	Asam urat	Positive
COVID19-Vac	298	Surabaya	M	Jawa	43	Security	N		2	2021-08-01	Astra Zeneca	N		Positive
COVID19-Vac	299	Surabaya	F	Jawa	53	Ibu Rumah Tangga	N		2	2021-06-21	Sinovac	N		Positive
COVID19-Vac	300	Surabaya	F	Jawa	53	PNS	N		2	2021-09-20	Astra Zeneca	Y	Asma, jantung	Positive
COVID19-Vac	301	Surabaya	F	Jawa	64	Ibu Rumah Tangga	N		2	2021-04-06	Sinovac	Y	Hipertensi, asam urat, asma	Positive
COVID19-Vac	302	Surabaya	F	Sunda	27	Tenaga medis	N		2	2021-02-23	Sinovac	N		Negative
COVID19-Vac	303	Surabaya	F	Jawa	32	Karyawan	N		2	2021-03-31	Sinovac	N		Positive
COVID19-Vac	304	Surabaya	F	Jawa	23	Staf Laboratorium	N		2	2021-02-16	Sinovac	N		Negative
COVID19-Vac	305	Surabaya	F	Jawa	60	Ibu Rumah Tangga	N		2	2021-07-17	Sinovac	N		Positive
COVID19-Vac	306	Surabaya	F	Jawa	60	Ibu Rumah Tangga	N		2	2021-07-17	Sinovac	Y	Hipertensi, kolesterol	Positive
COVID19-Vac	307	Surabaya	F	Jawa	45	Tenaga medis	N	Fatigue	2	2021-04-21	Sinovac	Y	Kolesterol	Positive
COVID19-Vac	308	Surabaya	F	Jawa	20	Tenaga medis	N		2	2021-02-06	Sinovac	N		Negative
COVID19-Vac	309	Surabaya	M	Chinese	44	Karyawan	N		2	2021-05-22	Sinovac	N		Negative
COVID19-Vac	310	Surabaya	F	Jawa	23	Tenaga medis	N		2	2021-02-03	Sinovac	N		Positive
COVID19-Vac	311	Surabaya	M	Jawa	21	Cleaning Service	N		2	2021-07-13	Astra Zeneca	N		Positive
COVID19-Vac	312	Surabaya	F	Jawa	52	Ibu Rumah Tangga	N		2	2021-09-04	Sinovac	N		Positive
COVID19-Vac	313	Surabaya	M	Jawa	31	Swasta	N		2	2021-09-06	Sinovac	N		Positive
COVID19-Vac	314	Surabaya	F	Jawa	19	Swasta	N		2	2021-09-29	Sinovac	N		Positive
COVID19-Vac	315	Surabaya	M	Jawa	29	Cleaning Service	N		2	2021-07-13	Astra Zeneca	N		Positive
COVID19-Vac	316	Surabaya	F	Jawa	54	Catering	N		2	2021-08-18	Sinovac	N		Positive
COVID19-Vac	318	Surabaya	M	Jawa	27	Cleaning Service	N		2	2021-07-12	Astra Zeneca	N		Positive
COVID19-Vac	319	Surabaya	M	Jawa	31	Swasta	N		2	2021-07-13	Astra Zeneca	N		Positive
COVID19-Vac	321	Surabaya	M	Jawa	48	Cleaning Service	N		2	2021-07-13	Astra Zeneca	N		Positive
COVID19-Vac	322	Surabaya	F	Jawa	42	Cleaning Service	N		2	2021-08-17	Astra Zeneca	N		Positive
COVID19-Vac	323	Surabaya	M	Jawa	43	Swasta	N		2	2021-08-17	Astra Zeneca	N		Positive
COVID19-Vac	324	Gresik	M	Sumatra	48	Swasta	N		2	2021-09-07	Sinovac	N		Positive
COVID19-Vac	325	Surabaya	M	Jawa	22	Cleaning Service	N		2	2021-07-13	Astra Zeneca	N		Positive
COVID19-Vac	326	Surabaya	F	Jawa	23	Swasta	N		2	2021-08-01	Sinovac	N		Positive
COVID19-Vac	327	Surabaya	F	Jawa	36	Cleaning Service	N		2	2021-07-14	Astra Zeneca	N		Positive
COVID19-Vac	329	Surabaya	F	Madura	27	Cleaning Service	N	Batuk	2	2021-06-16	Astra Zeneca	N		Positive
COVID19-Vac	330	Surabaya	F	Jawa	21		N		2	2021-08-13	Sinovac	N		Positive
COVID19-Vac	331	Surabaya	M	Jawa	45	Cleaning Service	N		2	2021-07-12	Astra Zeneca	N		Positive
COVID19-Vac	332	Jateng	M	Jawa	41	Swasta	N		2	2021-10-03	Sinovac	N		Positive
COVID19-Vac	333	Surabaya	F	Jawa	19	Swasta	N		2	2021-07-06	Sinovac	N		Positive
COVID19-Vac	334	Surabaya	F	Jawa	43	Swasta	N		2	2021-08-20	Sinovac	N		Positive
COVID19-Vac	335	Surabaya	F	Jawa	43	Ibu Rumah Tangga	N		2	2021-08-12	Sinovac	N		Positive
COVID19-Vac	336	Surabaya	M	Jawa	45	Pedagang	N		2	2021-08-12	Sinovac	N		Positive
COVID19-Vac	337	Surabaya	M	Jawa	52	Wiraswasta	N		2	2021-08-12	Sinovac	N		Positive
COVID19-Vac	338	Surabaya	F	Jawa	54	Ibu Rumah Tangga	N		2	2021-07-05	Sinovac	N		Negative
COVID19-Vac	339	Surabaya	M	Jawa	43	Swasta	N		2	2021-07-05	Sinovac	N		Positive
COVID19-Vac	340	Surabaya	M	Jawa	69	Pensiunan	N		2	2021-03-30	Sinovac	N		Positive
COVID19-Vac	341	Surabaya	M	Jawa	68	Buruh	N		2	2021-03-30	Sinovac	N		Positive
COVID19-Vac	342	Surabaya	M	Jawa	54	Swasta	N		2	2021-05-11	Sinovac	N		Positive
COVID19-Vac	343	Surabaya	M	Jawa	37	Swasta	N		2	2021-05-31	Sinovac	N		Positive
COVID19-Vac	344	Surabaya	M	Jawa	24	Karyawan	N		2	2021-07-07	Sinovac	N		Positive
COVID19-Vac	345	Surabaya	F	Jawa	40	Ibu Rumah Tangga	N		2	2021-07-05	Sinovac	N		Positive
COVID19-Vac	346	Surabaya	F	Jawa	33	Ibu Rumah Tangga	N		2	2021-07-05	Sinovac	N		Positive
COVID19-Vac	347	Surabaya	F	Jawa	52	Ibu Rumah Tangga	N		2	2021-07-27	Astra Zeneca	N		Positive
COVID19-Vac	348	Surabaya	F	Jawa	46	Ibu Rumah Tangga	N		2	2021-07-05	Sinovac	N		Positive
COVID19-Vac	349	Surabaya	F	Jawa	23	Mahasiswa	N		2	2021-08-12	Sinovac	N		Positive
COVID19-Vac	350	Surabaya	F	Jawa	55	Ibu Rumah Tangga	N		2	2021-07-05	Sinovac	N		Positive
COVID19-Vac	351	Surabaya	F	Jawa	41	Ibu Rumah Tangga	N		2	2021-07-05	Sinovac	N		Positive
COVID19-Vac	352	Surabaya	M	Jawa	55	Tukang	N		2	2021-07-05	Sinovac	N		Positive
COVID19-Vac	353	Surabaya	F	Jawa	40		N		2	2021-07-05	Sinovac	N		Positive
COVID19-Vac	354	Surabaya	F	Jawa	47	Swasta	N		2	2021-07-05	Sinovac	N		Positive
COVID19-Vac	355	Surabaya	F	Jawa	21	Ibu Rumah Tangga	N		2	2021-08-18	Sinovac	N		Positive
COVID19-Vac	356	Surabaya	F	Jawa	48	Swasta	N		2	2021-07-05	Sinovac	N		Positive
COVID19-Vac	357	Surabaya	M	Jawa	35	Karyawan	N		2	2021-06-01	Sinovac	N		Negative
COVID19-Vac	358	Surabaya	F	Jawa	71	Ibu Rumah Tangga	N		2	2021-04-28	Sinovac	N		Positive
COVID19-Vac	359	Surabaya	F	Jawa	33	Tenaga medis	N		2	2021-03-25	Sinovac	N		Positive
COVID19-Vac	360	Surabaya	M	Jawa	51	Tenaga kependidikan	N		2	2021-04-17	Sinovac	N		Negative
COVID19-Vac	361	Surabaya	M	Jawa	39	Dosen	N		2	2021-04-06	Sinovac	N		Negative
COVID19-Vac	362	Surabaya	F	Sunda	36	Tenaga medis	N		2	2021-02-01	Sinovac	N		Positive
COVID19-Vac	363	Surabaya	M	Madura	23	Tenaga medis	N		2	2021-02-24	Sinovac	N		Positive
COVID19-Vac	364	Surabaya	M	Jawa	50	Swasta	N		2	2021-07-13	Astra Zeneca	N		Positive
COVID19-Vac	365	Surabaya	F	Jawa	50	Dosen	N		2	2021-04-06	Sinovac	N		Negative
COVID19-Vac	366	Surabaya	F	Jawa	51	Ibu Rumah Tangga	N		2	2021-08-24	Astra Zeneca	N		Positive
COVID19-Vac	367	Surabaya	F	Jawa	25	Pegawai RS (non medis)	N		2	2021-02-14	Sinovac	N		Positive
COVID19-Vac	368	Surabaya	F	Jawa	39	Dosen	N		2	2021-02-16	Sinovac	N		Negative
COVID19-Vac	369	Surabaya	M	Jawa	28	Tenaga medis	N		2	2021-02-10	Sinovac	N		Positive
COVID19-Vac	370	Surabaya	F	Jawa	36	Dosen	N		2	2021-04-01	Sinovac	N		Negative
COVID19-Vac	371	Surabaya	M	Jawa	22		N		2	2021-08-18	Sinovac	N		Positive
COVID19-Vac	372	Surabaya	F	Jawa	24	Peneliti	N		2	2021-08-14	Sinovac	Y	Asma Bronkiale, penyakit jantung	Positive
COVID19-Vac	373	Sidarjo	F	Jawa	30	Dosen	N		2	2021-06-29	Astra Zeneca	N		Positive
COVID19-Vac	374	Surabaya	F	Jawa	26	Mahasiswa	N		2	2021-08-09	Sinovac	N		Positive
COVID19-Vac	377	Surabaya	M	Bali	57		N		2	2021-07-31	Astra Zeneca	N		Positive
COVID19-Vac	378	Surabaya	F	Jawa	56		N		2	2021-02-15	Sinovac	N		Positive
COVID19-Vac	379	Surabaya	M	Bali	22		N		2	2021-09-28	Sinovac	N		Positive
COVID19-Vac	380	Surabaya	F	Jawa	26	Karyawan	N		2	2021-02-14	Sinovac	N		Negative
COVID19-Vac	381	Surabaya	F	Jawa	25	Karyawan	N		2	2021-02-14	Sinovac	N		Positive
COVID19-Vac	382	Surabaya	F	Jawa	26	Karyawan	N		2	2021-03-20	Sinovac	N		Positive
COVID19-Vac	383	Surabaya	F	Jawa	71	Dosen	N		2	2021-04-05	Sinovac	Y	DM, Hipertensi, kanker, kolesterol	Negative
COVID19-Vac	384	Surabaya	M	Jawa	67	Dosen	N		2	2021-03-17	Sinovac	Y	Kolesterol	Positive
COVID19-Vac	385	Surabaya	F	Jawa	67	Dosen	N		2	2021-03-25	Sinovac	Y	DM, Hipertensi, kanker, kolesterol	Negative
COVID19-Vac	386	Surabaya	M	Jawa	71	Dosen	N		2	2021-04-05	Astra Zeneca	Y	Hipertensi, jantung	Positive
COVID19-Vac	387	Surabaya	F	Gorontalo	68	Ibu Rumah Tangga	N		2	2021-03-25	Sinovac	Y	Rheumathoid Arthritis	Negative
COVID19-Vac	388	Surabaya	F	Jawa	29	Staf laboratorium	N		2	2021-03-02	Sinovac	N		Negative
COVID19-Vac	389	Sidoarjo	F	Jawa	23	Mahasiswa	N		2	2021-02-15	Sinovac	N		Positive
COVID19-Vac	390	Surabaya	M	Gorontalo	68	Pensiunan	N		2	2021-05-09	Sinovac	Y	Pra hipertensi, Asam urat lebih dari normal	Negative
COVID19-Vac	391	Surabaya	F	Chinese Jawa Madura	55	Dosen	N		2	2021-02-15	Sinovac	Y	Hipertensi primer, Asam urat lebih dari normal	Negative
COVID19-Vac	392	Surabaya	M	Jawa	55	Pegawai RS Non PNS	N		2	2021-02-15	Sinovac	Y	Hipertensi	Negative
COVID19-Vac	393	Surabaya	M	Jawa	72	Pensiunan dosen	N		2	2021-03-23	Sinovac	Y	Asam urat lebih dari normal	Negative
COVID19-Vac	394	Sidoarjo	F	Jawa	65	Pensiunan dosen	N		2	2021-04-07	Sinovac	Y	DM, Kadar kolesterol lebih dari normal	Negative
COVID19-Vac	395	Surabaya	F	Jawa	62	Pensiunan dosen	N		2	2021-04-07	Sinovac	Y	DM, HT, Kadar kolesterol lebih dari normal	Negative
COVID19-Vac	396	Surabaya	F	Jawa	23	Mahasiswa	N		2	2021-07-24	Astra Zeneca	N		Positive
COVID19-Vac	V3 1	Surabaya	M	Madura	30	Staf laboratorium	N		3	2021-08-26	Sinovac (2 does) + Moderna (booster)	N		Positive
COVID19-Vac	V3 2	Surabaya	M	Aceh	54	Tenaga kependidikan	N		3	2021-08-26	Sinovac (2 does) + Moderna (booster)	N		Positive
COVID19-Vac	V3 3	Surabaya	M	Jawa	30	Staf laboratorium	N		3	2021-08-26	Sinovac (2 does) + Moderna (booster)	N		Positive
COVID19-Vac	V3 4	Surabaya	M	Jawa	59	Tenaga kependidikan	N		3	2021-08-26	Sinovac (2 does) + Moderna (booster)	N		Positive
COVID19-Vac	V3 5	Surabaya	M	Jawa	27	Swasta	N		3	2021-08-26	Sinovac (2 does) + Moderna (booster)	N		Positive
COVID19-Vac	V3 6	Surabaya	F	Jawa	27	Staf laboratorium	N		3	2021-08-26	Sinovac (2 does) + Moderna (booster)	N		Positive
COVID19-Vac	V3 7	Surabaya	F	Jawa	31	Staf laboratorium	N		3	2021-08-26	Sinovac (2 does) + Moderna (booster)	N		Positive
COVID19-Vac	V3 8	Surabaya	M	Jawa	45	Tenaga kependidikan	N		3	2021-08-26	Sinovac (2 does) + Moderna (booster)	N		Positive
COVID19-Vac	V3 9	Surabaya	F	Jawa	30	Staf laboratorium	N		3	2021-08-26	Sinovac (2 does) + Moderna (booster)	N		Positive
COVID19-Vac	V3 10	Surabaya	F	Jawa	30	Staf laboratorium	N		3	2021-08-26	Sinovac (2 does) + Moderna (booster)	N		Positive
COVID19-Vac	V3 11	Surabaya	M	Bali	35	Tenaga kependidikan	N		3	2021-08-26	Sinovac (2 does) + Moderna (booster)	N		Positive
COVID19-Vac	V3 12	Surabaya	F	Jawa	30	Staf laboratorium	N		3	2021-08-26	Sinovac (2 does) + Moderna (booster)	N		Positive
COVID19-Vac	V3 13	Surabaya	F	Jawa	50	Staf laboratorium	N		3	2021-08-26	Sinovac (2 does) + Moderna (booster)	N		Positive
COVID19-Vac	V3 14	Surabaya	M	Jawa	47	Tenaga kependidikan	N		3	2021-08-26	Sinovac (2 does) + Moderna (booster)	N		Positive
COVID19-Vac	V3 15	Surabaya	M	Jawa	53	Tenaga kependidikan	N		3	2021-08-26	Sinovac (2 does) + Moderna (booster)	N		Positive
COVID19-Vac	V3 16	Surabaya	F	Jawa	30	Staf laboratorium	N		3	2021-08-26	Sinovac (2 does) + Moderna (booster)	N		Positive
COVID19-Vac	V3 17	Surabaya	F	Jawa	32	Tenaga kependidikan	N		3	2021-08-26	Sinovac (2 does) + Moderna (booster)	N		Positive
COVID19-Vac	V3 18	Surabaya	M	Jawa	36	Staf laboratorium	N		3	2021-08-26	Sinovac (2 does) + Moderna (booster)	N		Positive
COVID19-Vac	V3 19	Surabaya	M	Jawa	25	Tenaga kependidikan	N		3	2021-08-26	Sinovac (2 does) + Moderna (booster)	N		Positive
COVID19-Vac	V3 20	Surabaya	F	Jawa	29	Tenaga kependidikan	N		3	2021-08-26	Sinovac (2 does) + Moderna (booster)	N		Positive
COVID19-Vac	V3 21	Surabaya	M	Jawa	32	Tenaga medis	N		3	2021-08-24	Sinovac (2 does) + Moderna (booster)	N		Positive
COVID19-Vac	V3 22	Surabaya	F	Jawa	22	Tenaga medis	N		3	2021-08-20	Sinovac (2 does) + Moderna (booster)	N		Positive
COVID19-Vac	V3 23	Surabaya	F	Jawa	36	Tenaga medis	N		3	2021-08-09	Sinovac (2 does) + Moderna (booster)	N		Positive
COVID19-Vac	V3 24	Surabaya	F	Jawa	34	Tenaga medis	N		3	2021-08-06	Sinovac (2 does) + Moderna (booster)	N		Positive
COVID19-Vac	V3 25	Surabaya	F	Jawa	29	Tenaga medis	N		3	2021-08-20	Sinovac (2 does) + Moderna (booster)	N		Positive
COVID19-Vac	V3 26	Surabaya	F	Jawa	35	Tenaga medis	N		3	2021-08-13	Sinovac (2 does) + Moderna (booster)	N		Positive
COVID19-Vac	V3 27	Surabaya	F	Jawa	22	Tenaga medis	N		3	2021-08-20	Sinovac (2 does) + Moderna (booster)	N		Positive
COVID19-Vac	V3 28	Surabaya	F	Jawa	27	Tenaga medis	N		3	2021-08-24	Sinovac (2 does) + Moderna (booster)	N		Positive
COVID19-Vac	V3 29	Surabaya	F	Jawa	32	Tenaga medis	N		3	2021-08-02	Sinovac (2 does) + Moderna (booster)	N		Positive
COVID19-Vac	V3 30	Surabaya	M	Jawa	36	Tenaga medis	N		3	2021-08-13	Sinovac (2 does) + Moderna (booster)	N		Positive
COVID19-Vac	V3 31	Surabaya	M	Jawa	38	Tenaga medis	N		3	2021-08-02	Sinovac (2 does) + Moderna (booster)	N		Positive
COVID19-Vac	V3 32	Surabaya	M	Jawa	29	Tenaga medis	N		3	2021-08-16	Sinovac (2 does) + Moderna (booster)	N		Positive
COVID19-Vac	V3 33	Surabaya	F	Jawa	25	Tenaga medis	N		3	2021-08-13	Sinovac (2 does) + Moderna (booster)	N		Positive
COVID19-Vac	V3 34	Surabaya	F	Jawa	24	Tenaga medis	N		3	2021-08-27	Sinovac (2 does) + Moderna (booster)	N		Positive
COVID19-Vac	V3 35	Surabaya	M	Jawa	34	Pegawai RS Non Medis	N		3	2021-08-13	Sinovac (2 does) + Moderna (booster)	N		Positive
COVID19-Vac	V3 36	Surabaya	F	Jawa	27	Tenaga medis	N		3	2021-08-13	Sinovac (2 does) + Moderna (booster)	N		Positive
COVID19-Vac	V3 37	Surabaya	M	Jawa	33	Tenaga medis	N		3	2021-08-02	Sinovac (2 does) + Moderna (booster)	N		Positive
COVID19-Vac	V3 38	Surabaya	F	Jawa	36	Pegawai RS Non Medis	N		3	2021-08-16	Sinovac (2 does) + Moderna (booster)	N		Positive
COVID19-Vac	V3 39	Surabaya	F	Jawa	32	Tenaga medis	N		3	2021-08-16	Sinovac (2 does) + Moderna (booster)	N		Positive
COVID19-Vac	V3 40	Surabaya	F	Jawa	27	Tenaga medis	N		3	2021-08-13	Sinovac (2 does) + Moderna (booster)	N		Positive
COVID19-Vac	V3 41	Surabaya	M	Jawa	30	Tenaga medis	N		3	2021-08-09	Sinovac (2 does) + Moderna (booster)	N		Positive
COVID19-Vac	V3 42	Surabaya	F	Jawa	31	Tenaga medis	N		3	2021-08-16	Sinovac (2 does) + Moderna (booster)	N		Positive
COVID19-Vac	V3 43	Surabaya	F	Jawa	37	Tenaga medis	N		3	2021-08-06	Sinovac (2 does) + Moderna (booster)	N		Positive
COVID19-Vac	V3 44	Surabaya	F	Jawa	27	Tenaga medis	N		3	2021-08-06	Sinovac (2 does) + Moderna (booster)	N		Positive
COVID19-Vac	V3 45	Surabaya	F	Jawa	32	Tenaga medis	N		3	2021-08-20	Sinovac (2 does) + Moderna (booster)	N		Positive
COVID19-Vac	V3 46	Surabaya	F	Jawa	44	Tenaga medis	N		3	2021-08-06	Sinovac (2 does) + Moderna (booster)	N		Positive
COVID19-Vac	V3 47	Surabaya	F	Jawa	33	Tenaga medis	N		3	2021-08-16	Sinovac (2 does) + Moderna (booster)	N		Positive
COVID19-Vac	V3 48	Surabaya	F	Jawa	26	Tenaga medis	N		3	2021-08-27	Sinovac (2 does) + Moderna (booster)	N		Positive
COVID19-Vac	V3 49	Surabaya	F	Jawa	31	Tenaga medis	N		3	2021-08-27	Sinovac (2 does) + Moderna (booster)	N		Positive
COVID19-Vac	V3 50	Surabaya	F	Jawa	32	Tenaga medis	N		3	2021-08-24	Sinovac (2 does) + Moderna (booster)	N		Positive
COVID19-Vac	V3 51	Surabaya	F	Jawa	26	Tenaga medis	N		3	2021-08-13	Sinovac (2 does) + Moderna (booster)	N		Positive
COVID19-Vac	V3 52	Surabaya	F	Jawa	35	Tenaga medis	N		3	2021-08-02	Sinovac (2 does) + Moderna (booster)	N		Positive
COVID19-Vac	V3 53	Surabaya	M	Jawa	26	Tenaga medis	N		3	2021-08-06	Sinovac (2 does) + Moderna (booster)	N		Positive
COVID19-Vac	V3 54	Surabaya	M	Madura	40	Tenaga medis	N		3	2021-08-25	Sinovac (2 does) + Moderna (booster)	N		Positive
COVID19-Vac	V3 55	Surabaya	M	Jawa	44	Tenaga medis	N		3	2021-08-10	Sinovac (2 does) + Moderna (booster)	N		Positive
COVID19-Vac	V3 56	Surabaya	F	Jawa	39	Tenaga medis	N		3	2021-08-13	Sinovac (2 does) + Moderna (booster)	N		Positive
COVID19-Vac	V3 57	Surabaya	M	Jawa	30	Tenaga medis	N		3	2021-08-13	Sinovac (2 does) + Moderna (booster)	N		Positive
COVID19-Vac	V3 58	Surabaya	F	Jawa	36	Dosen	N		3	2021-08-25	Sinovac (2 does) + Moderna (booster)	N		Positive
COVID19-Vac	V3 59	Surabaya	F	Jawa	28	Tenaga medis	N		3	2021-08-09	Sinovac (2 does) + Moderna (booster)	N		Positive
COVID19-Vac	V3 60	Surabaya	F	Jawa	29	Tenaga medis	N		3	2021-08-23	Sinovac (2 does) + Moderna (booster)	N		Positive
COVID19-Vac	V3 61	Surabaya	M	Jawa	43	Tenaga kependidikan	N		3	2021-08-26	Sinovac (2 does) + Moderna (booster)	N		Positive
COVID19-Vac	V3 62	Surabaya	F	Batak	26	Tenaga medis	N		3	2021-08-26	Sinovac (2 does) + Moderna (booster)	N		Positive
COVID19-Vac	V3 63	Surabaya	F	Jawa	23	Tenaga medis	N		3	2021-08-06	Sinovac (2 does) + Moderna (booster)	N		Positive
COVID19-Vac	V3 64	Surabaya	F	Jawa	25	Tenaga medis	N		3	2021-08-16	Sinovac (2 does) + Moderna (booster)	N		Positive
COVID19-Vac	V3 65	Surabaya	M	Jawa	33	Tenaga medis	N		3	2021-08-13	Sinovac (2 does) + Moderna (booster)	N		Positive
COVID19-Vac	V3 66	Surabaya	F	Jawa	23	Tenaga medis	N		3	2021-08-27	Sinovac (2 does) + Moderna (booster)	N		Positive
COVID19-Vac	V3 67	Surabaya	F	Jawa	25	Pegawai RS Non Medis	N		3	2021-08-20	Sinovac (2 does) + Moderna (booster)	N		Positive
COVID19-Vac	V3 68	Surabaya	F	Jawa	33	Tenaga medis	N		3	2021-08-06	Sinovac (2 does) + Moderna (booster)	N		Positive
COVID19-Vac	V3 69	Surabaya	F	Jawa	26	Tenaga medis	N		3	2021-08-27	Sinovac (2 does) + Moderna (booster)	N		Positive
COVID19-Vac	V3 70	Surabaya	F	Jawa	23	Tenaga medis	N		3	2021-08-27	Sinovac (2 does) + Moderna (booster)	N		Positive
COVID19-Vac	V3 71	Surabaya	F	Jawa	24	Tenaga medis	N		3	2021-08-20	Sinovac (2 does) + Moderna (booster)	N		Positive
COVID19-Vac	V3 72	Surabaya	F	Jawa	39	Tenaga medis	N		3	2021-08-16	Sinovac (2 does) + Moderna (booster)	N		Positive
COVID19-Vac	V3 73	Surabaya	F	Jawa	35	Tenaga medis	N		3	2021-08-07	Sinovac (2 does) + Moderna (booster)	N		Positive
COVID19-Vac	V3 74	Surabaya	F	Jawa	58	Pegawai RS Non Medis	N		3	2021-08-19	Sinovac (2 does) + Moderna (booster)	N		Positive
COVID19-Vac	V3 75	Surabaya	F	Jawa	34	Tenaga medis	N		3	2021-08-13	Sinovac (2 does) + Moderna (booster)	N		Positive
COVID19-Vac	V3 76	Surabaya	F	Jawa	50	Tenaga medis	N		3	2021-08-04	Sinovac (2 does) + Moderna (booster)	N		Positive
COVID19-Vac	V3 77	Surabaya	F	Jawa	57	Pegawai RS Non Medis	N		3	2021-08-23	Sinovac (2 does) + Moderna (booster)	N		Positive
COVID19-Vac	V3 78	Surabaya	M	Jawa	35	Tenaga medis	N		3	2021-08-02	Sinovac (2 does) + Moderna (booster)	N		Positive
COVID19-Vac	V3 79	Surabaya	F	Chinese	32	Tenaga medis	N		3	2021-08-25	Sinovac (2 does) + Moderna (booster)	N		Positive
COVID19-Vac	V3 80	Surabaya	M	Jawa	26	Pegawai RS Non Medis	N		3	2021-08-20	Sinovac (2 does) + Moderna (booster)	N		Positive
COVID19-Vac	V3 81	Surabaya	F	Jawa	30	Tenaga medis	N		3	2021-08-06	Sinovac (2 does) + Moderna (booster)	N		Positive
COVID19-Vac	V3 82	Surabaya	F	Jawa	34	Tenaga medis	N		3	2021-08-13	Sinovac (2 does) + Moderna (booster)	N		Positive
COVID19-Vac	V3 83	Surabaya	F	Jawa	25	Tenaga medis	N		3	2021-08-25	Sinovac (2 does) + Moderna (booster)	N		Positive
COVID19-Vac	V3 84	Surabaya	M	Jawa	35	Tenaga medis	N		3	2021-08-18	Sinovac (2 does) + Moderna (booster)	N		Positive
COVID19-Vac	V3 85	Surabaya	M	Jawa	35	Tenaga medis	N		3	2021-08-19	Sinovac (2 does) + Moderna (booster)	N		Positive
COVID19-Vac	V3 86	Surabaya	F	Jawa	39	Tenaga medis	N		3	2021-08-14	Sinovac (2 does) + Moderna (booster)	N		Positive
COVID19-Vac	V3 87	Surabaya	F	Sunda	40	Dosen	N		3	2021-08-25	Sinovac (2 does) + Moderna (booster)	N		Positive
COVID19-Vac	V3 88	Surabaya	M	Jawa	40	Tenaga medis	N		3	2021-08-09	Sinovac (2 does) + Moderna (booster)	N		Positive
COVID19-Vac	V3 89	Surabaya	F	Jawa	35	Tenaga medis	N		3	2021-08-29	Sinovac (2 does) + Moderna (booster)	N		Positive
COVID19-Vac	V3 90	Surabaya	F	Jawa	31	Tenaga medis	N		3	2021-08-26	Sinovac (2 does) + Moderna (booster)	N		Positive
COVID19-Vac	V3 91	Surabaya	F	Jawa	36	Pegawai RS Non Medis	N		3	2021-08-31	Sinovac (2 does) + Moderna (booster)	N		Positive
COVID19-Vac	V3 92	Surabaya	M	Jawa	39	Pegawai RS Non Medis	N		3	2021-08-24	Sinovac (2 does) + Moderna (booster)	N		Positive
COVID19-Vac	V3 93	Surabaya	M	Jawa	45	Tenaga medis	N		3	2021-08-11	Sinovac (2 does) + Moderna (booster)	N		Positive
COVID19-Vac	V3 94	Surabaya	M	Jawa	38	Tenaga medis	N		3	2021-08-16	Sinovac (2 does) + Moderna (booster)	N		Positive
COVID19-Vac	V3 95	Surabaya	F	Jawa	34	Tenaga medis	N		3	2021-08-06	Sinovac (2 does) + Moderna (booster)	N		Positive
COVID19-Vac	V3 96	Surabaya	F	Lain	25	Tenaga medis	N		3	2021-08-27	Sinovac (2 does) + Moderna (booster)	N		Positive
COVID19-Vac	V3 97	Surabaya	F	Jawa	29	Tenaga medis	N		3	2021-08-16	Sinovac (2 does) + Moderna (booster)	N		Positive
COVID19-Vac	V3 98	Surabaya	M	Jawa	49	Staf laboratorium	N		3	2021-08-26	Sinovac (2 does) + Moderna (booster)	N		Positive
COVID19-Vac	V3 99	Surabaya	M	Bali	30	Tenaga medis	N		3	2021-08-20	Sinovac (2 does) + Moderna (booster)	N		Positive
COVID19-Vac	V3 100	Surabaya	F	Batak	30	Tenaga kependidikan	N		3	2021-08-26	Sinovac (2 does) + Moderna (booster)	N		Positive
COVID19-Vac	V3 101	Surabaya	M	Madura	30	Tenaga kependidikan	N		3	2021-08-26	Sinovac (2 does) + Moderna (booster)	N		Positive
COVID19-Vac	V3 102	Surabaya	F	Jawa	40	Tenaga kependidikan	N		3	2021-08-26	Sinovac (2 does) + Moderna (booster)	N		Positive
COVID19-Vac	V3 103	Surabaya	F	Jawa	34	Staf laboratorium	N		3	2021-08-26	Sinovac (2 does) + Moderna (booster)	N		Positive
COVID19-Vac	V3 104	Surabaya	F	Jawa	37	Staf laboratorium	N		3	2021-08-26	Sinovac (2 does) + Moderna (booster)	N		Positive
COVID19-Vac	V3 105	Surabaya	F	Jawa	25	Staf laboratorium	N		3	2021-08-26	Sinovac (2 does) + Moderna (booster)	N		Positive
